# Supplementary material
Source: Royal Society of Chemistry journal article supplement (doi:10.1039/d6mh00561f)

## Inflammatory Cytokine Scavenging and Macrophage Metabolism Reprogramming to Orchestrate Inflammatory Bone Regeneration

**Table S1: Information of antibodies used in the experiment**

| Antibody      | Brand                      |
|---------------|----------------------------|
| TNFR1         | HUABIO                     |
| IL-6R         | Abcam                      |
| IL-6          | HUABIO                     |
| TNF- $\alpha$ | Bioswamp                   |
| iNOS          | Abcam                      |
| Arg-1         | Cell Signaling Technology  |
| p65           | Cell Signalling Technology |
| phospho-p65   | Santa Cruz                 |
| Anti-CD47     | Abcam                      |
| NRF2          | Cell Signalling Technology |
| p-NRF2        | HUABIO                     |
| Runx2         | HUABIO                     |
| OPN           | HUABIO                     |
| OCN           | HUABIO                     |
| VEGF          | Abcam                      |
| CD31          | HUABIO                     |

**Table S2. Primers used for qRT-PCR**

| Gene          | Forward Primer          | Reverse Primer          |
|---------------|-------------------------|-------------------------|
| GADPH         | AGGTCGGTGTGTGAACGGATTTG | TGTAGACCATGTAGTTGAGGTC  |
|               |                         | A                       |
| IL-1 $\beta$  | TGGAGAGTGTGGATCCCAAG    | GGTGCTGATGTACCAGTTGG    |
| IL-6          | ATAGTCCTTCCACCCCAATTTCC | GATGAATTGGATGGTCTTGGTCC |
| TNF- $\alpha$ | CTGAACTTCGGGGTGATCGG    | GGCTTGTCACCTCGAATTTGAGA |
| iNOS          | CAGAAGTGCAAAGTCTCAGACAT | GTCATCTTGTATTGTTGGGCT   |
| Arg-1         | ACATTGGCTTGCAGACGTA     | ATCACCTTGCCAATCCCCAG    |
| CD206         | AGACGAAATCCCTGCTACTG    | CACCCATTCTGAAGGCATTC    |
| ALP           | CCAACCTCTTTGTGCCAGAGA   | GGCTACATTGGTGTGAGCTTTT  |
| Runx2         | TTCAACGATCTGAGATTTGTGGG | GGATGAGGAATGCGCCCTA     |
| OPN           | CAGGGAGGCAGTACTCTTC     | AGTGTGGAAAGTGTGGCGTT    |
| VEGF          | AGGGCAGAATCATCACGAAGT   | AGGGTCTCGATTGGATGGCA    |
| CD31          | GGTGGAGTCTGGAGAGGACATT  | GGGTGGCATTGAGGTCATT     |

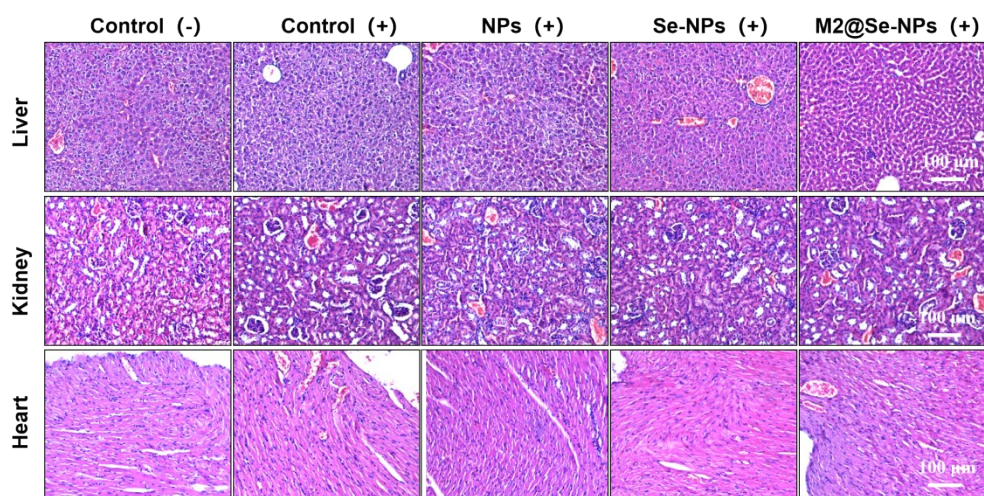

**Figure S1. H&E staining of heart, liver, and kidney sections show no evident pathological changes.**

The original, unprocessed Western blot images are shown as below:

Figure 2c, 2f

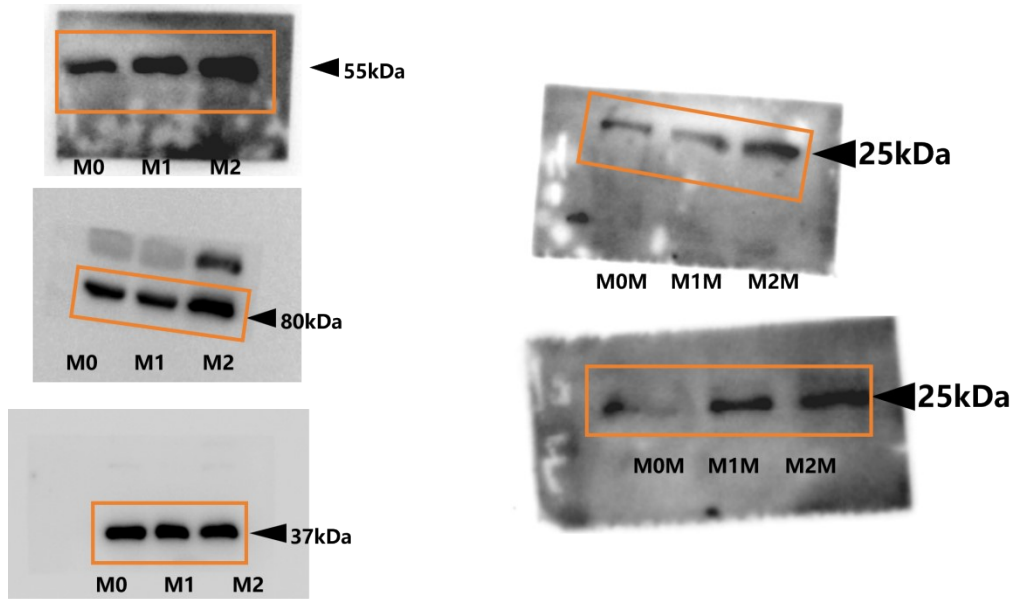

Figure 2j

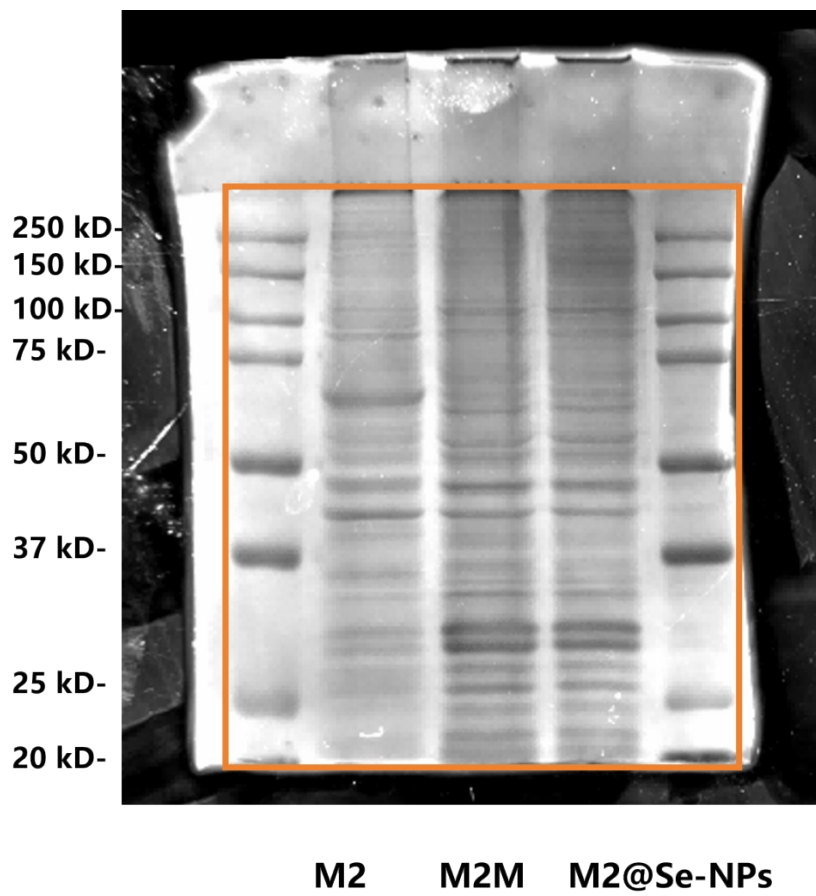

Figure 6b

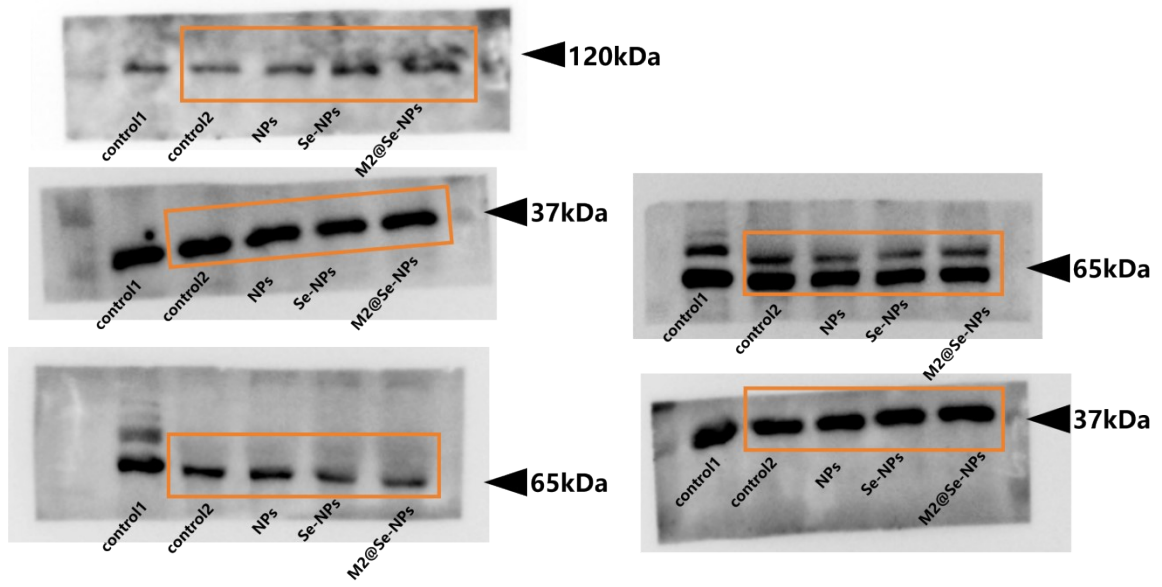

Figure 8h

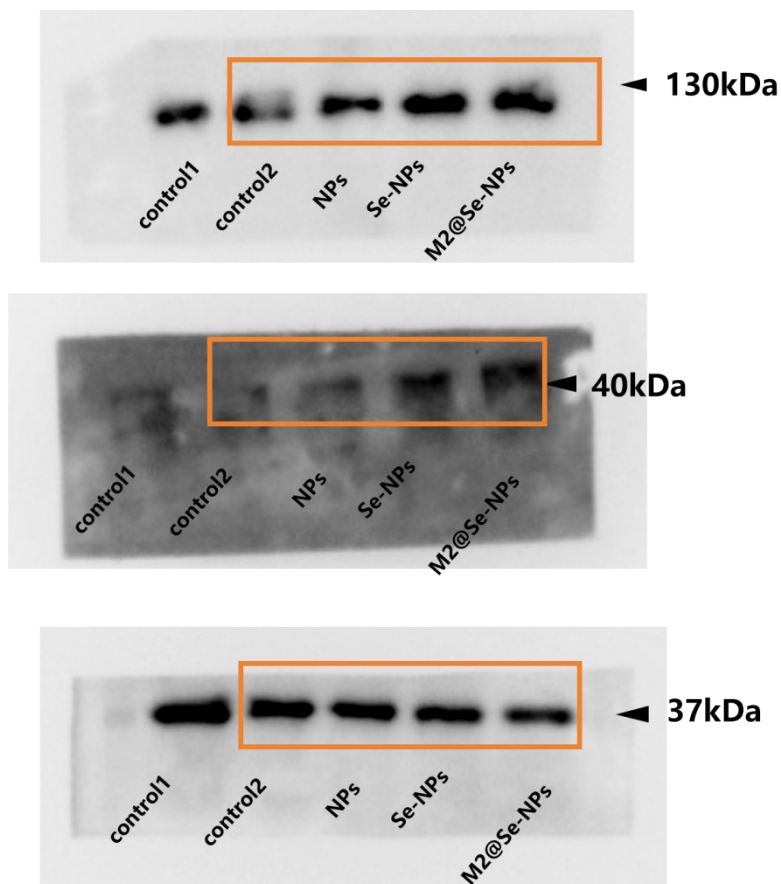

Supplement: d6mh00561f1.pdf [file d6mh00561f1.pdf]
